# Supplementary material for: Seasonal effect and long-term nutritional status following exit from a Community-Based Management of Severe Acute Malnutrition program in Bihar, India
Source: PubMed Central journal article supplement — Eur J Clin Nutr. 2015 Sep 2;70(4):437–44. doi: 10.1038/ejcn.2015.140 (PMC4827011; doi:10.1038/ejcn.2015.140), 2015-09-02

Number of children (Low Food Security)

Number of children (Moderate Food Security)

Number of children (High Food Security)

% wasted (Low Food Security)

% wasted (Moderate Food Security)

% wasted (High Food Security)

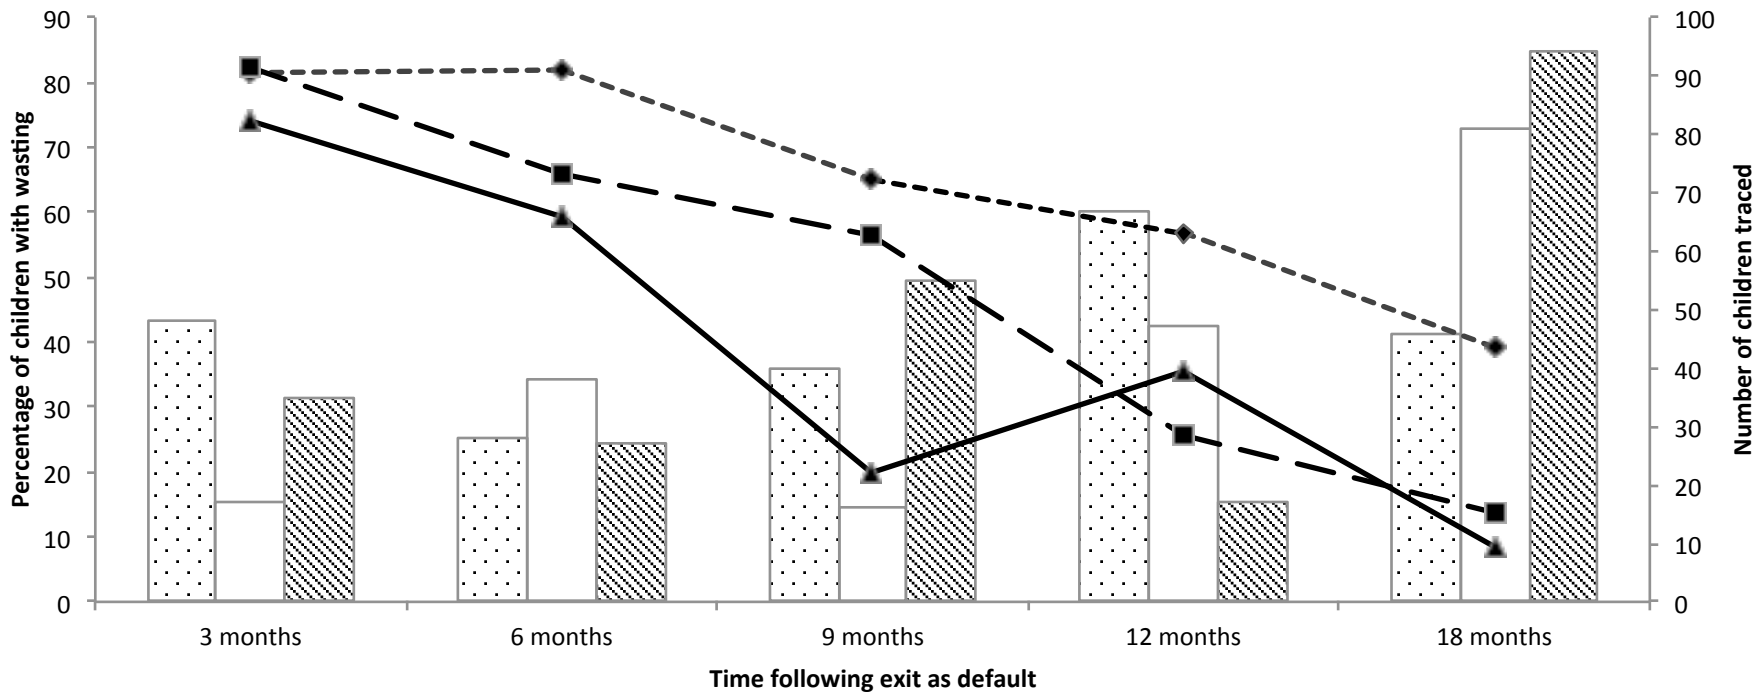

Supplement: ejcn2015140x5.pdf [file ejcn2015140x5.pdf]
